# Supplementary material for: Magnetic Resonance Relaxometry for Tumor Cell Density Imaging for Glioma: An Exploratory Study via 11C-Methionine PET and Its Validation via Stereotactic Tissue Sampling
Source: Cancers (Basel). 2021 Aug 12;13(16):4067. doi: 10.3390/cancers13164067 (PMC8393497; doi:10.3390/cancers13164067)
Supplement: Supplementary file 1 [file cancers-13-04067-s001.zip › Raw data for reproducing Figure 2 is provided as Excel Sheets denoted as Tables S1¿CS3..xlsx]

## Sheet: Table S1
Table S1. Source data for Figure 2A and D is provided. Only the bins color coded in yellow were used for creating panel D. Met-PET high probability (prob. Met high), Sum of the histograms of Met-PET low and high (freq. Total), 5% of the expected value, that is 0.1 divided by the number of bins (freq. Expected value/20).
T1 value	Met-PET high	Met-PET low	prob. Met high	freq. Total	freq. Expected value/20
-50	0.000340774	7.56355e-05		0.000416409	0.00188679
50	0	0		0
150	0	0		0
250	0	0		0
350	0	0		0
450	0	5.81811e-06		5.81811e-06
550	0	3.49087e-05		3.49087e-05
650	0	6.98174e-05		6.98174e-05
750	0	9.89079e-05		9.89079e-05
850	0.000100228	0.000767991		0.000868219
950	0.0025558	0.0103213	-0.603048	0.0128771
1050	0.00415944	0.0297189	-0.754449	0.0338784
1150	0.00479088	0.0428271	-0.798779	0.047618
1250	0.00622413	0.0477202	-0.769239	0.0539443
1350	0.00806832	0.0538292	-0.739301	0.0618975
1450	0.0139016	0.0648894	-0.647128	0.078791
1550	0.02201	0.0752864	-0.547569	0.0972964
1650	0.0350496	0.0798071	-0.389682	0.114857
1750	0.0465857	0.0659949	-0.172402	0.112581
1850	0.0698085	0.0691716	0.00458272	0.13898
1950	0.0981027	0.065256	0.201071	0.163359
2050	0.0863159	0.0436417	0.328371	0.129958
2150	0.122127	0.0475573	0.439462	0.169684
2250	0.0871478	0.0298644	0.489551	0.117012
2350	0.076203	0.0260361	0.490683	0.102239
2450	0.0642258	0.0239241	0.457195	0.0881499
2550	0.0523288	0.0219401	0.409171	0.0742689
2650	0.0419151	0.0222077	0.307338	0.0641229
2750	0.0316619	0.0202819	0.219081	0.0519438
2850	0.0259489	0.0190427	0.1535	0.0449916
2950	0.014082	0.0123519	0.0654506	0.0264338
3050	0.0174596	0.017146	0.00906359	0.0346056
3150	0.00913073	0.0106239	-0.0755849	0.0197546
3250	0.00723643	0.00999552	-0.160115	0.0172319
3350	0.00644463	0.00925662	-0.179093	0.0157012
3450	0.0081485	0.0125089	-0.211084	0.0206574
3550	0.00438997	0.00749373	-0.261178	0.0118837
3650	0.00407926	0.00666756	-0.240843	0.0107468
3750	0.00361821	0.00540503	-0.198024	0.00902324
3850	0.00276628	0.00487558	-0.276019	0.00764186
3950	0.0026861	0.00404359	-0.201717	0.00672969
4050	0.00102232	0.00228652	-0.382067	0.00330884
4150	0.00200455	0.00308942	-0.212971	0.00509397
4250	0.00201457	0.00347923	-0.266602	0.00549381
4350	0.0153448	0.0302367	-0.326709	0.0455816
4450		2.90906e-05		2.90906e-05
4550		5.81811e-06		5.81811e-06
4650		1.74543e-05		1.74543e-05
4750		0		0
4850		5.81811e-06		5.81811e-06
4950		0		0
5050		1.16362e-05		1.16362e-05
5150		9.89079e-05		9.89079e-05

## Sheet: Table S2
Table S2. Source data for Figure 2B and E is provided. Data range for creating panel E is indicated in colom F. Met-PET high probability (prob. Met high), Sum of the histograms of Met-PET low and high (freq. Total), 5% of the expected value, that is 0.1 divided by the number of bins (freq. Expected value/20).
T2 value	Met-PET high	Met-PET low	prob. Met high	freq. Total	freq. Expected value/20
0	0.000340774	7.56355e-05		0.000416409	0.000173611
5	0	0		0
10	0	0		0
15	0	0		0
20	0	0		0
25	0	5.81811e-06		5.81811e-06
30	0	5.81811e-06		5.81811e-06
35	1.00228e-05	5.81811e-06		1.58409e-05
40	2.00455e-05	1.16362e-05		3.16817e-05
45	3.00683e-05	1.16362e-05		4.17045e-05
50	4.0091e-05	7.56355e-05		0.000115726
55	9.02048e-05	6.98174e-05		0.000160022
60	0.000420956	0.00030836	0.154385	0.000729316
65	0.000942139	0.00141962	-0.202172	0.00236176
70	0.0019845	0.0064872	-0.531498	0.0084717
75	0.00377858	0.0199329	-0.681287	0.0237114
80	0.0073567	0.044846	-0.718149	0.0522027
85	0.0124683	0.0576284	-0.644254	0.0700967
90	0.0162769	0.0601302	-0.573942	0.0764072
95	0.0209175	0.0611135	-0.49001	0.082031
100	0.0267607	0.0576342	-0.365821	0.084395
105	0.0321329	0.0497507	-0.215156	0.0818836
110	0.0391088	0.041873	-0.0341335	0.0809817
115	0.0470769	0.0347283	0.150951	0.0818052
120	0.0531106	0.030004	0.278008	0.0831146
125	0.0552955	0.0268681	0.345986	0.0821636
130	0.0539926	0.0249539	0.367827	0.0789465
135	0.0545037	0.0233015	0.401029	0.0778053
140	0.0514769	0.021527	0.41025	0.0730039
145	0.0467662	0.0201714	0.397307	0.0669376
150	0.0433484	0.0190718	0.388923	0.0624202
155	0.0375653	0.0178151	0.356629	0.0553803
160	0.0340573	0.0162442	0.354127	0.0503015
165	0.0310605	0.0159998	0.32003	0.0470603
170	0.0279735	0.0146326	0.313123	0.0426061
175	0.0256282	0.0140275	0.292536	0.0396556
180	0.0226815	0.0136318	0.24921	0.0363133
185	0.0205567	0.0121948	0.255314	0.0327514
190	0.0183717	0.0119388	0.212235	0.0303105
195	0.0164173	0.0114268	0.17923	0.027844
200	0.0151644	0.0107984	0.168164	0.0259628
205	0.0130496	0.0101642	0.124295	0.0232139
210	0.0123681	0.00993734	0.108975	0.0223054
215	0.0107344	0.00897153	0.0894572	0.0197059
220	0.0102032	0.00868644	0.0802937	0.0188896
225	0.00901045	0.00834899	0.0381037	0.0173594
230	0.00781775	0.00791845	-0.0063997	0.0157362
235	0.00694577	0.007581	-0.0437286	0.0145268
240	0.00593347	0.00673738	-0.0634454	0.0126708
245	0.00640454	0.00644065	-0.00281148	0.0128452
250	0.00543233	0.00594029	-0.0446654	0.0113726
255	0.00498131	0.00633593	-0.119695	0.0113172
260	0.00469065	0.00545157	-0.0750255	0.0101422
265	0.00424965	0.00556794	-0.134278	0.00981758
270	0.00353803	0.00534103	-0.203062	0.00887906
275	0.00348792	0.00508503	-0.186297	0.00857295
280	0.00325739	0.00486976	-0.198393	0.00812716
285	0.00280637	0.00464286	-0.246534	0.00744923
290	0.00307698	0.00479994	-0.218735	0.00787693
295	0.00228519	0.00463122	-0.339198	0.00691641
300	0.00228519	0.00459049	-0.335284	0.00687568
305	0.00201457	0.00471267	-0.40107	0.00672725
310	0.00219498	0.00447995	-0.34232	0.00667493
315	0.00182414	0.00434031	-0.408174	0.00616445
320	0.00192437	0.00412504	-0.363783	0.00604941
325	0.00177403	0.00376432	-0.359366	0.00553835
330	0.00175398	0.00394468	-0.384423	0.00569866
335	0.00147334	0.00362469	-0.421995	0.00509803
340	0.00146332	0.00358978	-0.420822	0.0050531
345	0.00117266	0.00334542	-0.480902	0.00451808
350	0.0012328	0.00307196	-0.42724	0.00430476
355	0.00130296	0.00311269	-0.409845	0.00441565
360	0.00108246	0.00293233	-0.460765	0.00401479
365	0.000972207	0.0030196	-0.512899	0.00399181
370	0.00106241	0.00299051	-0.475731	0.00405292
375	0.0010123	0.00285669	-0.476712	0.00386899
380	0.00102232	0.0025367	-0.425504	0.00355902
385	0.00108246	0.00250761	-0.396971	0.00359006
390	0.00106241	0.00237961	-0.382681	0.00344202
395	0.00098223	0.00231561	-0.404319	0.00329784
400	0.00080182	0.00233306	-0.488453	0.00313488
405	0.000821866	0.00223997	-0.463156	0.00306184
410	0.000721638	0.00217016	-0.500906	0.00289179
415	0.000661502	0.00204216	-0.510662	0.00270366
420	0.00069157	0.00223416	-0.527249	0.00292573
425	0.000711615	0.00212943	-0.499047	0.00284105
430	0.000641456	0.00217597	-0.544652	0.00281743
435	0.000571297	0.0019607	-0.548739	0.002532
440	0.000681547	0.00185598	-0.462825	0.00253753
445	0.000651479	0.00166398	-0.437279	0.00231546
450	0.000621411	0.00184434	-0.495967	0.00246575
455	0.00058132	0.00173962	-0.499064	0.00232094
460	0.00058132	0.00150107	-0.441681	0.00208239
465	0.000571297	0.00140798	-0.422723	0.00197928
470	0.000621411	0.00142544	-0.392812	0.00204685
475	0.000471069	0.00139053	-0.493909	0.0018616
480	0.000491115	0.00159998	-0.53028	0.0020911
485	0.000541229	0.00133235	-0.422251	0.00187358
490	0.000420956	0.00125089	-0.496419	0.00167185
495	0.000430978	0.0011578	-0.457474	0.00158878
500	0.000420956	0.00131489	-0.514986	0.00173585
505	0.000340774	0.00107053	-0.517081	0.00141131
510	0.000370842	0.0011229	-0.503471	0.00149374
515	0.000420956	0.00104144	-0.424294	0.0014624
520	0.000390887	0.000826172	-0.357653	0.00121706
525	0.000430978	0.000750537	-0.270465	0.00118152
530	0.000451024	0.000861081	-0.312519	0.0013121
535	0.00040091	0.000936716	-0.400565	0.00133763
540	0.000310705	0.000750537	-0.41445	0.00106124
545	0.000370842	0.000674901	-0.290759	0.00104574
550	0.000210478	0.000814536	-0.589317	0.00102501
555	0.000260592	0.000744719	-0.48157	0.00100531
560	0.000300683	0.000639993	-0.360709	0.000940675
565	0.000320728	0.000645811	-0.336337	0.000966539
570	0.00029066	0.000599266	-0.346777	0.000889926
575	0.00029066	0.000605084	-0.35102	0.000895744
580	0.000330751	0.000605084	-0.293143	0.000935835
585	0.000300683	0.000529448	-0.275578	0.000830131
590	0.000240546	0.000459631	-0.312899	0.000700177
595	0.000300683	0.000506176	-0.254683	0.000806858
600	0.000310705	0.000477085	-0.211198	0.000787791
605	0.000260592	0.00040145	-0.212764	0.000662041
610	0.000250569	0.000314178	-0.112633	0.000564747
615	0.000260592	0.000378177	-0.184082	0.000638769
620	0.000280637	0.000343269	-0.100386	0.000623906
625	0.000190432	0.00040145	-0.35652	0.000591882
630	0.00018041	0.000360723	-0.333215	0.000541133
635	0.000270614	0.000319996	-0.0836117	0.000590611
640	0.000200455	0.000290906	-0.184082	0.000491361
645	0.000220501	0.000273451	-0.107198	0.000493952
650	0.000170387	0.000267633	-0.222014	0.00043802
655	0.000270614	0.000232725	0.0752768	0.000503339
660	0.000250569	0.00030836	-0.103396	0.000558929
665	0.000150341	0.000267633	-0.28062	0.000417975
670	0.000190432	0.000226906	-0.087397	0.000417339
675	0.000220501	0.000162907	0.150214	0.000383408
680	0.000140319	0.000151271	-0.0375612	0.000291589
685	0.000160364	0.000250179	-0.218771	0.000410543
690	0.000220501	0.000157089	0.167937	0.00037759
695	0.000200455	0.000226906	-0.0618947	0.000427361
700	0.000200455	0.000221088	-0.048947	0.000421543
705	0.00018041	0.000139635	0.127404	0.000320044
710	0.00018041	0.000168725	0.0334662	0.000349135
715	0.000220501	0.000180362	0.100132	0.000400862
720	0.000250569	0.000116362	0.365754	0.000366931
725	0.000170387	0.00012218	0.16477	0.000292567
730	0.00011025	0.000191998	-0.270465	0.000302248
735	0.000100228	0.000174543	-0.270465	0.000274771
740	0.000100228	0.000110544	-0.048947	0.000210772
745	0.000140319	0.000116362	0.0933309	0.000256681
750	0.000140319	0.000110544	0.118688	0.000250863
755	9.02048e-05	0.000157089	-0.270465	0.000247294
760	0.000140319	9.30898e-05	0.202344	0.000233408
765	0.000160364	9.89079e-05	0.237033	0.000259272
770	0.000120273	8.14536e-05	0.192436	0.000201727
775	0.00011025	8.72717e-05	0.116334	0.000197522
780	0.000200455	5.2363e-05	0.585765	0.000252818
785	0.000120273	9.89079e-05	0.0974769	0.000219181
790	0.000120273	0.000110544	0.0421496	0.000230817
795	0.000170387	9.89079e-05	0.26543	0.000269295
800	4.0091e-05	0.000104726	-0.446322	0.000144817		This bin was included for analysis as this bin is sandwitched between bins with freq. Total > freq. Expected value/20
805	0.000170387	9.89079e-05	0.26543	0.000269295
810	9.02048e-05	6.39993e-05	0.169941	0.000154204		This bin was included for analysis as this bin is sandwitched between bins with freq. Total > freq. Expected value/20
815	0.000130296	8.14536e-05	0.23066	0.000211749
820	9.02048e-05	9.30898e-05	-0.01574	0.000183295
825	0.000100228	0.000110544	-0.048947	0.000210772
830	0.000100228	5.2363e-05	0.313679	0.000152591		This bin was included for analysis as this bin is sandwitched between bins with freq. Total > freq. Expected value/20
835	9.02048e-05	8.72717e-05	0.0165264	0.000177476
840	7.01593e-05	7.56355e-05	-0.0375612	0.000145795		This bin was included for analysis as this bin is sandwitched between bins with freq. Total > freq. Expected value/20
845	0.000140319	9.30898e-05	0.202344	0.000233408
850	7.01593e-05	9.89079e-05	-0.170043	0.000169067		This bin was included for analysis as this bin is sandwitched between bins with freq. Total > freq. Expected value/20
855	0.000100228	9.30898e-05	0.0369221	0.000193317
860	0.000100228	6.39993e-05	0.220599	0.000164227		These bins were included for analysis as this bin is sandwitched between bins with freq. Total > freq. Expected value/20
865	7.01593e-05	9.30898e-05	-0.140464	0.000163249		These bins were included for analysis as this bin is sandwitched between bins with freq. Total > freq. Expected value/20
870	0.000100228	7.56355e-05	0.139836	0.000175863
875	9.02048e-05	4.07268e-05	0.377892	0.000130932		These bins were included for analysis as this bin is sandwitched between bins with freq. Total > freq. Expected value/20
880	9.02048e-05	6.98174e-05	0.127404	0.000160022		These bins were included for analysis as this bin is sandwitched between bins with freq. Total > freq. Expected value/20
885	0.00011025	6.39993e-05	0.26543	0.00017425
890	9.02048e-05	4.07268e-05	0.377892	0.000130932		These bins were included for analysis as this bin is sandwitched between bins with freq. Total > freq. Expected value/20
895	0.00011025	2.32725e-05	0.651408	0.000133523		These bins were included for analysis as this bin is sandwitched between bins with freq. Total > freq. Expected value/20
900	7.01593e-05	3.49087e-05	0.335503	0.000105068		These bins were included for analysis as this bin is sandwitched between bins with freq. Total > freq. Expected value/20
905	5.01138e-05	5.81811e-05	-0.0744946	0.000108295		These bins were included for analysis as this bin is sandwitched between bins with freq. Total > freq. Expected value/20
910	5.01138e-05	5.2363e-05	-0.0219491	0.000102477		These bins were included for analysis as this bin is sandwitched between bins with freq. Total > freq. Expected value/20
915	9.02048e-05	5.81811e-05	0.215813	0.000148386		These bins were included for analysis as this bin is sandwitched between bins with freq. Total > freq. Expected value/20
920	8.0182e-05	2.90906e-05	0.46756	0.000109273		These bins were included for analysis as this bin is sandwitched between bins with freq. Total > freq. Expected value/20
925	0.000120273	8.14536e-05	0.192436	0.000201727
930	0.000100228	0.000104726	-0.0219491	0.000204954
935	6.01365e-05	4.07268e-05		0.000100863
940	6.01365e-05	4.65449e-05		0.000106681
945	0.000100228	2.90906e-05		0.000129318
950	6.01365e-05	3.49087e-05		9.50452e-05
955	7.01593e-05	2.32725e-05		9.34317e-05
960	9.02048e-05	6.98174e-05		0.000160022
965	2.00455e-05	6.98174e-05		8.98629e-05
970	5.01138e-05	2.90906e-05		7.92043e-05
975	6.01365e-05	5.81811e-05		0.000118318
980	4.0091e-05	3.49087e-05		7.49997e-05
985	6.01365e-05	1.74543e-05		7.75909e-05
990	5.01138e-05	5.81811e-05		0.000108295
995	4.0091e-05	2.90906e-05		6.91816e-05
1000	3.00683e-05	2.32725e-05		5.33407e-05
1005	4.0091e-05	2.90906e-05		6.91816e-05
1010	7.01593e-05	2.32725e-05		9.34317e-05
1015	8.0182e-05	0		8.0182e-05
1020	5.01138e-05	1.16362e-05		6.175e-05
1025	5.01138e-05	5.81811e-06		5.59319e-05
1030	5.01138e-05	2.90906e-05		7.92043e-05
1035	4.0091e-05	1.74543e-05		5.75453e-05
1040	1.00228e-05	2.32725e-05		3.32952e-05
1045	0.000100228	4.07268e-05		0.000140954
1050	1.00228e-05	2.32725e-05		3.32952e-05
1055	4.0091e-05	5.81811e-06		4.59091e-05
1060	3.00683e-05	1.74543e-05		4.75226e-05
1065	6.01365e-05	3.49087e-05		9.50452e-05
1070	3.00683e-05	2.90906e-05		5.91588e-05
1075	4.0091e-05	2.32725e-05		6.33635e-05
1080	4.0091e-05	5.81811e-06		4.59091e-05
1085	4.0091e-05	1.74543e-05		5.75453e-05
1090	5.01138e-05	1.16362e-05		6.175e-05
1095	3.00683e-05	2.32725e-05		5.33407e-05
1100	2.00455e-05	2.32725e-05		4.3318e-05
1105	3.00683e-05	5.81811e-05		8.82494e-05
1110	7.01593e-05	5.81811e-06		7.59774e-05
1115	6.01365e-05	2.32725e-05		8.3409e-05
1120	2.00455e-05	5.81811e-06		2.58636e-05
1125	3.00683e-05	1.74543e-05		4.75226e-05
1130	1.00228e-05	1.74543e-05		2.74771e-05
1135	2.00455e-05	1.16362e-05		3.16817e-05
1140	5.01138e-05	1.16362e-05		6.175e-05
1145	2.00455e-05	2.32725e-05		4.3318e-05
1150	2.00455e-05	1.16362e-05		3.16817e-05
1155	1.00228e-05	5.81811e-06		1.58409e-05
1160	1.00228e-05	5.81811e-06		1.58409e-05
1165	3.00683e-05	1.16362e-05		4.17045e-05
1170	2.00455e-05	5.81811e-06		2.58636e-05
1175	2.00455e-05	2.32725e-05		4.3318e-05
1180	4.0091e-05	1.74543e-05		5.75453e-05
1185	5.01138e-05	0		5.01138e-05
1190	6.01365e-05	1.16362e-05		7.17727e-05
1195	4.0091e-05	5.81811e-06		4.59091e-05
1200	2.00455e-05	2.90906e-05		4.91361e-05
1205	4.0091e-05	0		4.0091e-05
1210	2.00455e-05	1.74543e-05		3.74998e-05
1215	5.01138e-05	1.16362e-05		6.175e-05
1220	6.01365e-05	5.81811e-06		6.59546e-05
1225	3.00683e-05	2.32725e-05		5.33407e-05
1230	2.00455e-05	2.32725e-05		4.3318e-05
1235	2.00455e-05	1.74543e-05		3.74998e-05
1240	2.00455e-05	2.32725e-05		4.3318e-05
1245	5.01138e-05	5.81811e-06		5.59319e-05
1250	3.00683e-05	5.81811e-06		3.58864e-05
1255	2.00455e-05	1.16362e-05		3.16817e-05
1260	6.01365e-05	0		6.01365e-05
1265	1.00228e-05	1.74543e-05		2.74771e-05
1270	2.00455e-05	5.81811e-06		2.58636e-05
1275	0	1.16362e-05		1.16362e-05
1280	2.00455e-05	1.16362e-05		3.16817e-05
1285	2.00455e-05	1.16362e-05		3.16817e-05
1290	1.00228e-05	1.74543e-05		2.74771e-05
1295	1.00228e-05	1.16362e-05		2.1659e-05
1300	1.00228e-05	1.74543e-05		2.74771e-05
1305	4.0091e-05	1.16362e-05		5.17272e-05
1310	2.00455e-05	5.81811e-06		2.58636e-05
1315	0	5.81811e-06		5.81811e-06
1320	0	0		0
1325	1.00228e-05	1.74543e-05		2.74771e-05
1330	4.0091e-05	3.49087e-05		7.49997e-05
1335	1.00228e-05	1.16362e-05		2.1659e-05
1340	1.00228e-05	1.16362e-05		2.1659e-05
1345	0	5.81811e-06		5.81811e-06
1350	2.00455e-05	5.81811e-06		2.58636e-05
1355	2.00455e-05	0		2.00455e-05
1360	3.00683e-05	0		3.00683e-05
1365	2.00455e-05	1.16362e-05		3.16817e-05
1370	2.00455e-05	5.81811e-06		2.58636e-05
1375	3.00683e-05	1.16362e-05		4.17045e-05
1380	2.00455e-05	5.81811e-06		2.58636e-05
1385	3.00683e-05	5.81811e-06		3.58864e-05
1390	1.00228e-05	1.74543e-05		2.74771e-05
1395	3.00683e-05	5.81811e-06		3.58864e-05
1400	0	1.16362e-05		1.16362e-05
1405	0	0		0
1410	1.00228e-05	5.81811e-06		1.58409e-05
1415	1.00228e-05	0		1.00228e-05
1420	0	0		0
1425	0	1.74543e-05		1.74543e-05
1430	2.00455e-05	0		2.00455e-05
1435	0	1.74543e-05		1.74543e-05
1440	1.00228e-05	5.81811e-06		1.58409e-05
1445	2.00455e-05	1.16362e-05		3.16817e-05
1450	2.00455e-05	0		2.00455e-05
1455	0	0		0
1460	0	0		0
1465	2.00455e-05	5.81811e-06		2.58636e-05
1470	2.00455e-05	0		2.00455e-05
1475	2.00455e-05	0		2.00455e-05
1480	3.00683e-05	5.81811e-06		3.58864e-05
1485	1.00228e-05	0		1.00228e-05
1490	2.00455e-05	1.16362e-05		3.16817e-05
1495	0	0		0
1500	1.00228e-05	0		1.00228e-05
1505	2.00455e-05	1.16362e-05		3.16817e-05
1510	1.00228e-05	5.81811e-06		1.58409e-05
1515	0	5.81811e-06		5.81811e-06
1520	3.00683e-05	0		3.00683e-05
1525	0	5.81811e-06		5.81811e-06
1530	1.00228e-05	0		1.00228e-05
1535	0	0		0
1540	0	0		0
1545	3.00683e-05	5.81811e-06		3.58864e-05
1550	2.00455e-05	1.16362e-05		3.16817e-05
1555	0	0		0
1560	2.00455e-05	0		2.00455e-05
1565	0	0		0
1570	1.00228e-05	5.81811e-06		1.58409e-05
1575	1.00228e-05	0		1.00228e-05
1580	0	5.81811e-06		5.81811e-06
1585	1.00228e-05	1.16362e-05		2.1659e-05
1590	1.00228e-05	2.32725e-05		3.32952e-05
1595	2.00455e-05	1.16362e-05		3.16817e-05
1600	1.00228e-05	1.74543e-05		2.74771e-05
1605	0	0		0
1610	1.00228e-05	0		1.00228e-05
1615	1.00228e-05	0		1.00228e-05
1620	2.00455e-05	0		2.00455e-05
1625	1.00228e-05	0		1.00228e-05
1630	2.00455e-05	0		2.00455e-05
1635	0	0		0
1640	2.00455e-05	5.81811e-06		2.58636e-05
1645	0	0		0
1650	1.00228e-05	0		1.00228e-05
1655	0	1.16362e-05		1.16362e-05
1660	0	0		0
1665	1.00228e-05	0		1.00228e-05
1670	2.00455e-05	5.81811e-06		2.58636e-05
1675	0	5.81811e-06		5.81811e-06
1680	0	0		0
1685	1.00228e-05	1.74543e-05		2.74771e-05
1690	0	0		0
1695	0	1.16362e-05		1.16362e-05
1700	0	5.81811e-06		5.81811e-06
1705	1.00228e-05	0		1.00228e-05
1710	1.00228e-05	0		1.00228e-05
1715	1.00228e-05	0		1.00228e-05
1720	0	0		0
1725	0	5.81811e-06		5.81811e-06
1730	2.00455e-05	0		2.00455e-05
1735	1.00228e-05	0		1.00228e-05
1740	0	0		0
1745	1.00228e-05	1.16362e-05		2.1659e-05
1750	0	1.16362e-05		1.16362e-05
1755	0	0		0
1760	0	0		0
1765	1.00228e-05	0		1.00228e-05
1770	0	0		0
1775	0	0		0
1780	0	5.81811e-06		5.81811e-06
1785	1.00228e-05	0		1.00228e-05
1790	0	1.74543e-05		1.74543e-05
1795	1.00228e-05	0		1.00228e-05
1800	1.00228e-05	0		1.00228e-05
1805	0	0		0
1810	2.00455e-05	5.81811e-06		2.58636e-05
1815	0	5.81811e-06		5.81811e-06
1820	0	0		0
1825	0	0		0
1830	1.00228e-05	5.81811e-06		1.58409e-05
1835	0	0		0
1840	0	2.32725e-05		2.32725e-05
1845	0	1.16362e-05		1.16362e-05
1850	0	0		0
1855	1.00228e-05	0		1.00228e-05
1860	2.00455e-05	0		2.00455e-05
1865	1.00228e-05	0		1.00228e-05
1870	0	5.81811e-06		5.81811e-06
1875	0	0		0
1880	0	0		0
1885	0	0		0
1890	0	5.81811e-06		5.81811e-06
1895	0	5.81811e-06		5.81811e-06
1900	0	0		0
1905	0	0		0
1910	0	5.81811e-06		5.81811e-06
1915	0	1.16362e-05		1.16362e-05
1920	0	5.81811e-06		5.81811e-06
1925	0	0		0
1930	0	5.81811e-06		5.81811e-06
1935	0	0		0
1940	2.00455e-05	0		2.00455e-05
1945	1.00228e-05	0		1.00228e-05
1950	0	0		0
1955	0	0		0
1960	1.00228e-05	0		1.00228e-05
1965	0	5.81811e-06		5.81811e-06
1970	2.00455e-05	0		2.00455e-05
1975	0	0		0
1980	0	5.81811e-06		5.81811e-06
1985	1.00228e-05	0		1.00228e-05
1990	0	0		0
1995	0	0		0
2000	1.00228e-05	0		1.00228e-05
2005	0	0		0
2010	1.00228e-05	0		1.00228e-05
2015	1.00228e-05	0		1.00228e-05
2020	0	0		0
2025	0	5.81811e-06		5.81811e-06
2030	0	5.81811e-06		5.81811e-06
2035	0	5.81811e-06		5.81811e-06
2040	1.00228e-05	0		1.00228e-05
2045	0	5.81811e-06		5.81811e-06
2050	2.00455e-05	0		2.00455e-05
2055	1.00228e-05	5.81811e-06		1.58409e-05
2060	0	0		0
2065	1.00228e-05	0		1.00228e-05
2070	0	5.81811e-06		5.81811e-06
2075	0	0		0
2080	2.00455e-05	0		2.00455e-05
2085	0	5.81811e-06		5.81811e-06
2090	0	0		0
2095	0	0		0
2100	0	0		0
2105	0	0		0
2110	0	0		0
2115	0	0		0
2120	0	0		0
2125	0	0		0
2130	0	5.81811e-06		5.81811e-06
2135	1.00228e-05	0		1.00228e-05
2140	0	0		0
2145	0	0		0
2150	0	5.81811e-06		5.81811e-06
2155	0	0		0
2160	1.00228e-05	0		1.00228e-05
2165	0	0		0
2170	1.00228e-05	0		1.00228e-05
2175	0	0		0
2180	0	5.81811e-06		5.81811e-06
2185	0	0		0
2190	0	5.81811e-06		5.81811e-06
2195	0	5.81811e-06		5.81811e-06
2200	0	0		0
2205	0	0		0
2210	0	0		0
2215	0	0		0
2220	0	0		0
2225	0	0		0
2230	0	0		0
2235	1.00228e-05	0		1.00228e-05
2240	0	0		0
2245	1.00228e-05	0		1.00228e-05
2250	0	0		0
2255	0	0		0
2260	0	0		0
2265	0	0		0
2270	0	5.81811e-06		5.81811e-06
2275	0	5.81811e-06		5.81811e-06
2280	0	0		0
2285	1.00228e-05	1.74543e-05		2.74771e-05
2290	0	1.16362e-05		1.16362e-05
2295	0	0		0
2300	1.00228e-05	0		1.00228e-05
2305	0	0		0
2310	0	0		0
2315	0	0		0
2320	0	0		0
2325	0	0		0
2330	0	0		0
2335	1.00228e-05	0		1.00228e-05
2340	0	0		0
2345	0	1.16362e-05		1.16362e-05
2350	1.00228e-05	0		1.00228e-05
2355	0	5.81811e-06		5.81811e-06
2360	0	0		0
2365	0	0		0
2370	0	0		0
2375	0	0		0
2380	0	0		0
2385	0	0		0
2390	0	0		0
2395	0	1.16362e-05		1.16362e-05
2400	0	0		0
2405	0	0		0
2410	0	0		0
2415	0	0		0
2420	0	0		0
2425	0	0		0
2430	0	0		0
2435	0	0		0
2440	0	0		0
2445	0	0		0
2450	0	5.81811e-06		5.81811e-06
2455	0	5.81811e-06		5.81811e-06
2460	0	0		0
2465	1.00228e-05	0		1.00228e-05
2470	0	0		0
2475	0	0		0
2480	0	0		0
2485	1.00228e-05	0		1.00228e-05
2490	0	0		0
2495	1.00228e-05	0		1.00228e-05
2500	0	0		0
2505	0	0		0
2510	1.00228e-05	0		1.00228e-05
2515	0	0		0
2520	0	0		0
2525	0	0		0
2530	0	0		0
2535	0	0		0
2540	0	0		0
2545	0	0		0
2550	0	0		0
2555	0	0		0
2560	0	0		0
2565	0	0		0
2570	0	0		0
2575	0	0		0
2580	0	0		0
2585	0	0		0
2590	0	1.16362e-05		1.16362e-05
2595	0	0		0
2600	0	0		0
2605	1.00228e-05	0		1.00228e-05
2610	1.00228e-05	0		1.00228e-05
2615	0	0		0
2620	0	0		0
2625	0	0		0
2630	0	0		0
2635	0	0		0
2640	0	0		0
2645	0	0		0
2650	0	0		0
2655	0	5.81811e-06		5.81811e-06
2660	0	0		0
2665	0	0		0
2670	0	0		0
2675	0	0		0
2680	0	0		0
2685	1.00228e-05	0		1.00228e-05
2690	0	0		0
2695	0	0		0
2700	0	5.81811e-06		5.81811e-06
2705	0	0		0
2710	0	0		0
2715	1.00228e-05	0		1.00228e-05
2720	0	5.81811e-06		5.81811e-06
2725	0	0		0
2730	0	0		0
2735	0	5.81811e-06		5.81811e-06
2740	0	0		0
2745	0	0		0
2750	0	0		0
2755	0	5.81811e-06		5.81811e-06
2760	0	0		0
2765	1.00228e-05	0		1.00228e-05
2770	0	0		0
2775	0	0		0
2780	0	5.81811e-06		5.81811e-06
2785	0	0		0
2790	0	0		0
2795	0	0		0
2800	0	0		0
2805	0	0		0
2810	0	0		0
2815	0	0		0
2820	0	0		0
2825	2.00455e-05	0		2.00455e-05
2830	0	0		0
2835	0	0		0
2840	0	0		0
2845	0	5.81811e-06		5.81811e-06
2850	0	0		0
2855	0	0		0
2860	0	0		0
2865	0	5.81811e-06		5.81811e-06
2870	1.00228e-05	0		1.00228e-05
2875	0	5.81811e-06		5.81811e-06

## Sheet: Table S3
Table S3. Source data for Figure 2C and F is provided. Only the bins color coded in yellow were used for creating panel E. Met-PET high probability (prob. Met high), Sum of the histograms of Met-PET low and high (freq. Total), 5% of the expected value, that is 0.1 divided by the number of bins (freq. Expected value/20).
ADC	Met-PET high	Met-PET low	prob. Met high	freq. Total	freq. Expected value/20
0	0.00222505	0.000552721		0.00277777	0.0015625
5e-05	0.000681547	0.000273451		0.000954998
0.0001	0.000531206	0.00030836		0.000839566
0.00015	0.000280637	0.000250179		0.000530816
0.0002	0.000270614	0.000296724		0.000567338
0.00025	0.000441001	0.000715628		0.00115663
0.0003	0.000420956	0.00070981		0.00113077
0.00035	0.000541229	0.000651629		0.00119286
0.0004	0.000571297	0.000680719		0.00125202
0.00045	0.000621411	0.000575993		0.0011974
0.0005	0.000701593	0.000855263		0.00155686
0.00055	0.000942139	0.00121017	-0.124531	0.00215231
0.0006	0.001764	0.00196652	-0.0542868	0.00373053
0.00065	0.00459042	0.00781373	-0.259857	0.0124041
0.0007	0.0121877	0.031796	-0.445809	0.0439837
0.00075	0.0230624	0.0684094	-0.495749	0.0914717
0.0008	0.0318122	0.0808892	-0.43546	0.112701
0.00085	0.0421858	0.0733141	-0.269509	0.1155
0.0009	0.0594449	0.0708472	-0.0875129	0.130292
0.00095	0.0767242	0.0688807	0.0538685	0.145605
0.001	0.0853237	0.0623353	0.155686	0.147659
0.00105	0.0889118	0.0552837	0.233212	0.144196
0.0011	0.0886312	0.0500591	0.278117	0.13869
0.00115	0.0849729	0.0430831	0.327121	0.128056
0.0012	0.0762832	0.0376839	0.338688	0.113967
0.00125	0.0649775	0.0320927	0.338773	0.0970702
0.0013	0.0536117	0.0296724	0.287442	0.0832841
0.00135	0.0366432	0.0259372	0.171077	0.0625803
0.0014	0.0283544	0.0241917	0.079219	0.0525461
0.00145	0.0215589	0.0214165	0.00331494	0.0429754
0.0015	0.0178205	0.0198165	-0.0530342	0.0376369
0.00155	0.0138514	0.0186238	-0.146953	0.0324752
0.0016	0.0103034	0.017978	-0.271365	0.0282814
0.00165	0.00935123	0.0169831	-0.289806	0.0263343
0.0017	0.00708609	0.0161453	-0.389955	0.0232314
0.00175	0.00690568	0.0162849	-0.404441	0.0231906
0.0018	0.00539224	0.0138471	-0.439457	0.0192394
0.00185	0.00482094	0.0135504	-0.475167	0.0183713
0.0019	0.00447015	0.013818	-0.511143	0.0182882
0.00195	0.00372846	0.0108915	-0.489949	0.01462
0.002	0.00345785	0.00840717	-0.417136	0.011865
0.00205	0.0029968	0.0068421	-0.390826	0.0098389
0.0021	0.00287653	0.00524212	-0.291377	0.00811865
0.00215	0.00234532	0.00413086	-0.275708	0.00647618
0.0022	0.00197448	0.00382832	-0.319473	0.0058028
0.00225	0.00213485	0.00326396	-0.209142	0.00539881
0.0023	0.00197448	0.0030836	-0.219276	0.00505808
0.00235	0.00139316	0.00285088	-0.343473	0.00424404
0.0024	0.00129293	0.0026647	-0.346612	0.00395763
0.00245	0.00135307	0.00242034	-0.282838	0.00377341
0.0025	0.00129293	0.00210034	-0.237943	0.00339327
0.00255	0.000882002	0.00169307	-0.314969	0.00257507
0.0026	0.000661502	0.00107053	-0.236157	0.00173203
0.00265	0.000671524	0.000628356		0.00129988
0.0027	0.000781775	0.000680719		0.00146249
0.00275	0.000631433	0.000279269		0.000910703
0.0028	0.000150341	9.30898e-05		0.000243431
0.00285	4.0091e-05	1.74543e-05		5.75453e-05
0.0029	5.01138e-05	1.16362e-05		6.175e-05
0.00295	1.00228e-05	0		1.00228e-05
0.003	0	0		0
0.00305	2.00455e-05	0		2.00455e-05
0.0031	0	0		0
0.00315	1.00228e-05	0		1.00228e-05
